# Supplementary material
Source: publisher site journal article supplement (https://www.dovepress.com/article/291286)
Supplement: Supplementary file 1 [file get_supplementary_file.php]

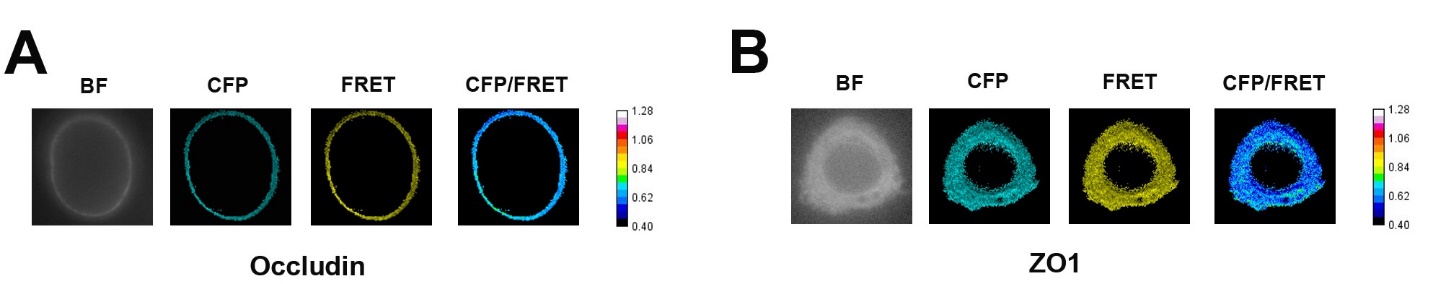


**Figure S1. Fluorescence images of occludin/ ZO1 probes in different signals in isotonic condition.** A. Representative fluorescence images of occludin probe-transfected HBMEC cells under bright field, CFP (cyan), FRET (yellow), and CFP/FRET signals. B. Representative fluorescence images of ZO1 probe-transfected HBMEC cells under bright field, CFP (cyan), FRET (yellow), and CFP / FRET signals.

**
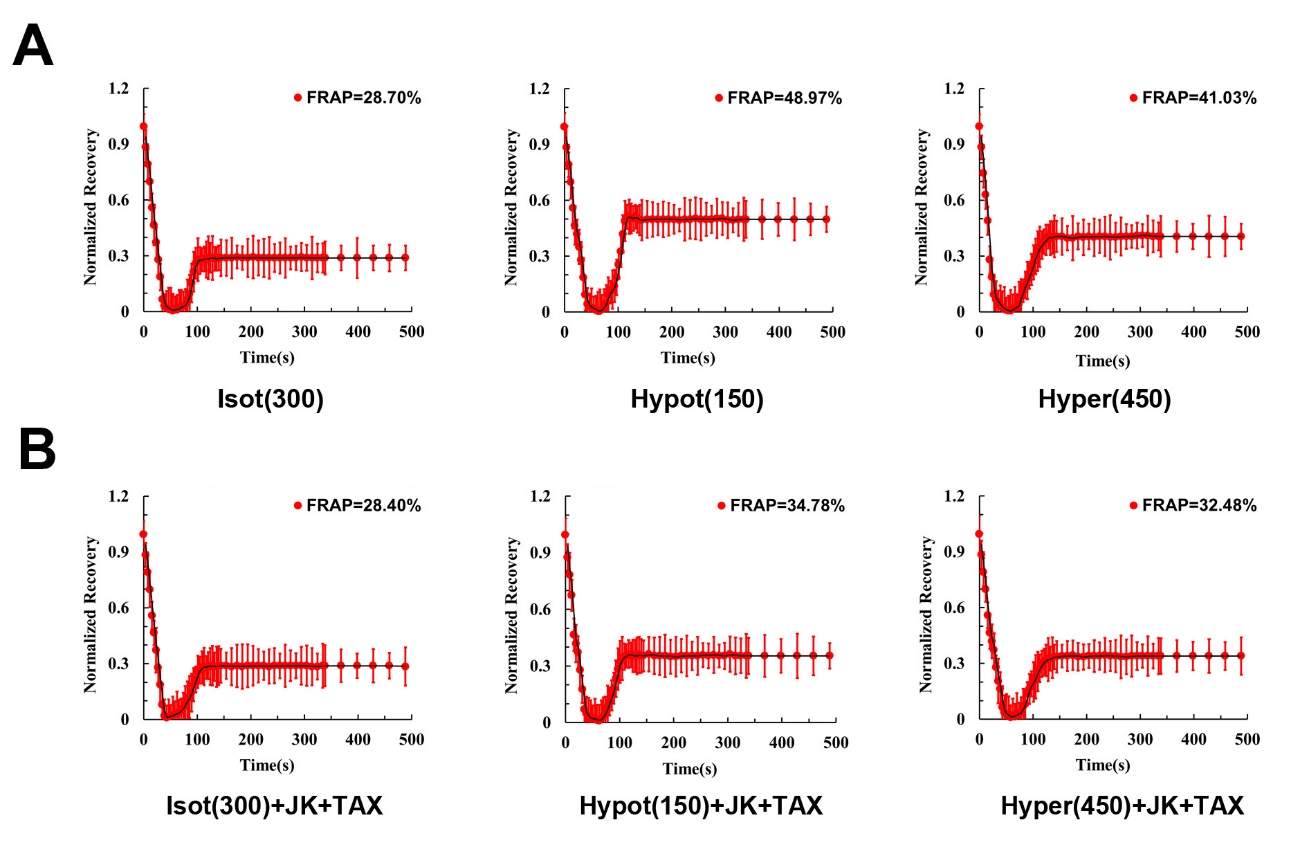
**

**Figure S2. Mobility of occludin probe on cytomembranes determined by FRAP tests under different OPs.** A. Normalized FRAP ratio of occludin probe on the cytomembrane in HBMEC cells in isotonic (300 mOsm/kg), hypotonic (150 mOsm/kg), and hypertonic (450 mOsm/kg) solution, for 500 s. B. Normalized FRAP ratio of occludin probe on the cytomembrane in HBMEC cells in isotonic(300)+JK+TAX, hypotonic(150)+JK+TAX, and hypertonic(450)+JK+TAX solution for 500 s (n = 8).
